# Supplementary material
Source: PubMed Central journal article supplement (PMC3830978)
Supplement: NIHMS479116-supplement-supplement_1.pdf [file NIHMS479116-supplement-supplement_1.pdf]

**TABLE S1** Intercorrelations for All Indicator Variables

| Variable                                   | 1      | 2      | 3      | 4      | 5      | 6      | 7      | 8      | 9      | 10     | 11     | 12     | 13     | 14     |
|--------------------------------------------|--------|--------|--------|--------|--------|--------|--------|--------|--------|--------|--------|--------|--------|--------|
| 1. Frequency of Vocals                     |        |        |        |        |        |        |        |        |        |        |        |        |        |        |
| 2. Pointing                                | 0.45** |        |        |        |        |        |        |        |        |        |        |        |        |        |
| 3. Gestures                                | 0.43** | 0.48** |        |        |        |        |        |        |        |        |        |        |        |        |
| 4. Eye Contact                             | 0.49** | 0.29** | 0.29** |        |        |        |        |        |        |        |        |        |        |        |
| 5. Facial Expressions                      | 0.49** | 0.39** | 0.30** | 0.52** |        |        |        |        |        |        |        |        |        |        |
| 6. Integration                             | 0.60** | 0.38** | 0.44** | 0.62** | 0.49** |        |        |        |        |        |        |        |        |        |
| 7. Shared Enjoyment                        | 0.38** | 0.19** | 0.23** | 0.40** | 0.45** | 0.43** |        |        |        |        |        |        |        |        |
| 8. Requesting                              | 0.54** | 0.36** | 0.43** | 0.52** | 0.45** | 0.65** | 0.44** |        |        |        |        |        |        |        |
| 9. Showing                                 | 0.38** | 0.38** | 0.27** | 0.29** | 0.26** | 0.31** | 0.20** | 0.27** |        |        |        |        |        |        |
| 10. Initiation of Joint Attention          | 0.35** | 0.31** | 0.19** | 0.29** | 0.32** | 0.35** | 0.24** | 0.33** | 0.15*  |        |        |        |        |        |
| 11. Quality of Social Overtures            | 0.48** | 0.30** | 0.31** | 0.48** | 0.35** | 0.46** | 0.42** | 0.45** | 0.30** | 0.29** |        |        |        |        |
| 12. Amount of Social Overtures – Caregiver | 0.38** | 0.29** | 0.25** | 0.40** | 0.39** | 0.33** | 0.23** | 0.31** | 0.36** | 0.29** | 0.41** |        |        |        |
| 13. Quality of Rapport                     | 0.51** | 0.40** | 0.37** | 0.48** | 0.49** | 0.53** | 0.50** | 0.43** | 0.33** | 0.35** | 0.61** | 0.46** |        |        |
| 14. Response to Name                       | 0.29** | 0.26** | 0.17** | 0.26** | 0.28** | 0.25** | 0.19** | 0.18** | 0.20** | 0.08   | 0.27** | 0.26** | 0.33** |        |
| 15. Response to Joint Attention            | 0.45** | 0.42** | 0.43** | 0.32** | 0.29** | 0.43** | 0.13   | 0.37** | 0.33** | 0.23** | 0.26** | 0.28** | 0.33** | 0.21** |
| 16. Ignore                                 | 0.30** | 0.29** | 0.26** | 0.28** | 0.17*  | 0.34** | 0.17** | 0.20** | 0.18** | 0.24** | 0.24** | 0.25** | 0.32** | 0.19** |
| 17. F/S Imitation                          | 0.36** | 0.27** | 0.32** | 0.15*  | 0.16*  | 0.26** | 0.21** | 0.33** | 0.16*  | 0.11   | 0.24** | 0.13   | 0.27** | 0.17*  |
| 18. Functional Play                        | 0.29** | 0.29** | 0.35** | 0.19   | 0.23** | 0.29** | 0.18** | 0.33** | 0.34** | 0.11   | 0.25** | 0.30** | 0.28** | 0.09   |
| 19. Imagination and Creativity             | 0.25** | 0.34** | 0.29** | 0.14*  | 0.15*  | 0.21** | 0.04   | 0.20** | 0.21** | 0.02   | 0.22** | 0.22** | 0.16*  | 0.14*  |
| 20. Sensory Interests                      | 0.11   | 0.23** | 0.15*  | 0.19   | 0.20** | 0.20** | 0.07   | 0.11   | 0.16*  | 0.12   | 0.15*  | 0.12   | 0.34** | 0.16*  |
| 21. Hand and Finger                        | 0.02   | 0.09   | -0.05  | -0.11  | 0.00   | -0.09  | -0.03  | -0.04  | 0.10   | -0.10  | 0.13*  | 0.03   | 0.06   | 0.09   |
| 22. Complex Mannerisms                     | 0.08   | 0.15*  | -0.01  | 0.10   | 0.13   | 0.09   | 0.04   | 0.06   | 0.07   | 0.00   | 0.18** | 0.11   | 0.16   | 0.16*  |
| 23. Repetitive Interests/Behaviors         | 0.15*  | 0.12   | 0.07   | 0.06   | 0.08   | 0.08   | 0.02   | 0.03   | 0.05   | 0.15*  | 0.10   | 0.08   | 0.35** | 0.16*  |
| 24. Intonation                             | 0.26** | 0.27** | 0.14   | 0.19*  | 0.27** | 0.21** | 0.15*  | 0.10   | 0.17*  | 0.13   | 0.34** | 0.24** | 0.36** | 0.17*  |
| 25. Immediate Echolalia                    | 0.25*  | 0.10   | 0.05   | 0.18   | 0.15   | 0.27*  | 0.03   | 0.11   | 0.11   | 0.12   | 0.17   | 0.05   | 0.22   | 0.17   |
| 26. Stereotyped Language                   | 0.12   | 0.34*  | 0.03   | 0.26   | 0.08   | -0.20  | 0.00   | -0.07  | 0.15   | 0.10   | 0.01   | 0.19   | 0.29   | 0.03   |

TABLE S1 Continued

| Variable                              | 15     | 16    | 17     | 18     | 19   | 20     | 21     | 22     | 23    | 24     | 25    |
|---------------------------------------|--------|-------|--------|--------|------|--------|--------|--------|-------|--------|-------|
| 16. Ignore                            | 0.22** |       |        |        |      |        |        |        |       |        |       |
| 17. Functional and Symbolic Imitation | 0.30** | 0.16* |        |        |      |        |        |        |       |        |       |
| 18. Functional Play                   | 0.29** | 0.08  | 0.38** |        |      |        |        |        |       |        |       |
| 19. Imagination and Creativity        | 0.24** | 0.10  | 0.42** | 0.49** |      |        |        |        |       |        |       |
| 20. Sensory Interests                 | 0.22** | 0.14* | 0.06   | 0.11   | 0.08 |        |        |        |       |        |       |
| 21. Hand and Finger                   | 0.02   | 0.07  | 0.11   | 0.10   | 0.10 | 0.21** |        |        |       |        |       |
| 22. Complex Mannerisms                | 0.07   | 0.06  | 0.02   | 0.10   | 0.09 | 0.26** | 0.26** |        |       |        |       |
| 23. Repetitive Interests/Behaviors    | 0.16*  | 0.14* | 0.08   | 0.05   | 0.00 | 0.31** | 0.03   | 0.16*  |       |        |       |
| 24. Intonation                        | 0.06   | 0.09  | 0.16*  | 0.16*  | 0.07 | 0.27** | 0.20** | 0.24** | 0.30* |        |       |
| 25. Immediate Echolia                 | -0.07  | -0.02 | -0.15  | 0.11   | 0.08 | 0.12   | 0.09   | 0.25*  | 0.00  | 0.10   |       |
| 26. Stereotyped Language              | 0.13   | 0.17  | -0.28  | 0.07   | 0.04 | 0.30*  | -0.03  | -0.12  | 0.30* | 0.41** | 0.32* |

Note: \*p < .05; \*\*p < .01.
